# Supplementary material for: Enhancing coking resistance of nickel-based catalysts for dry reforming of methane via nitric oxide abatement: a support study
Source: Royal Society of Chemistry journal article supplement (doi:10.1039/d4cy00936c), 2024-01-01

## Appendix A. Supplementary Information

### 1. N<sub>2</sub> PHYSYSORPTION MEASUREMENTS OF CALCINED SAMPLES

FIG. A.1- Pore size distribution for calcined samples (NiO/Al<sub>2</sub>O<sub>3</sub> (a), NiO/MgAl<sub>2</sub>O<sub>4</sub>-Al<sub>2</sub>O<sub>3</sub> (b), NiO/CaZrO<sub>3</sub> (c) and NiO/LaFeO<sub>3</sub> (d)).

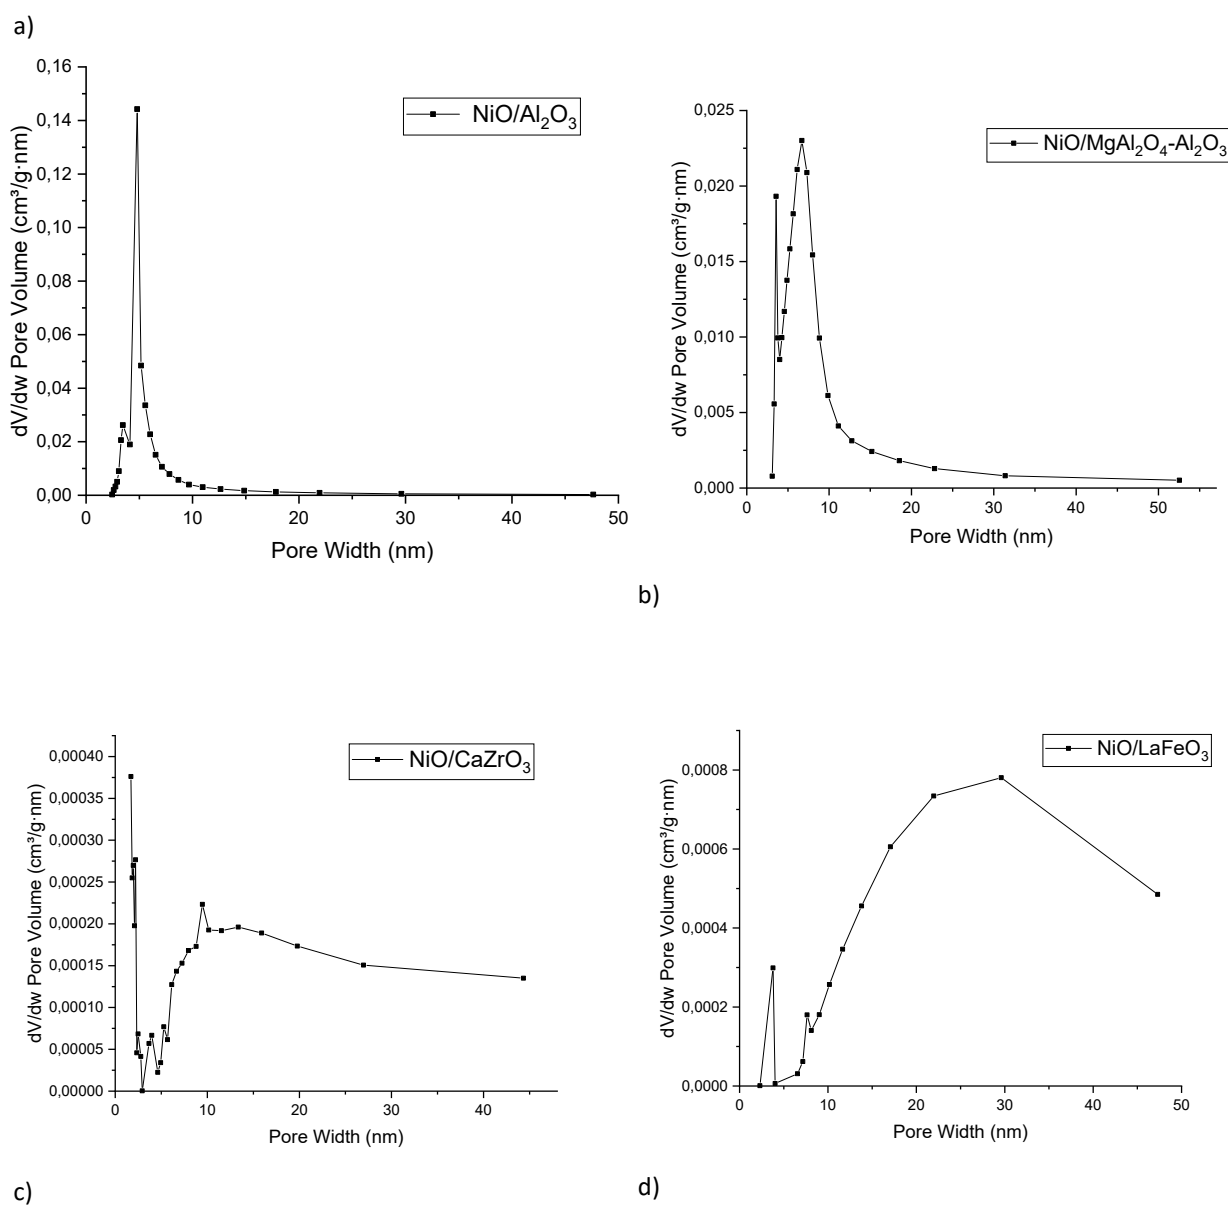

FIG. A.2- N<sub>2</sub>-physorption of NiO/Al<sub>2</sub>O<sub>3</sub> (a), NiO/MgAl<sub>2</sub>O<sub>4</sub>-Al<sub>2</sub>O<sub>3</sub> (b), NiO/CaZrO<sub>3</sub> (c) and NiO/LaFeO<sub>3</sub> (d) catalysts.

a)

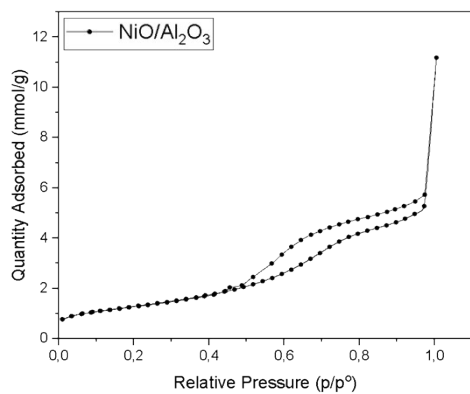

b)

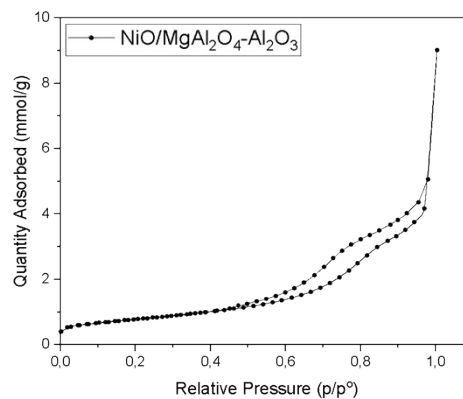

c)

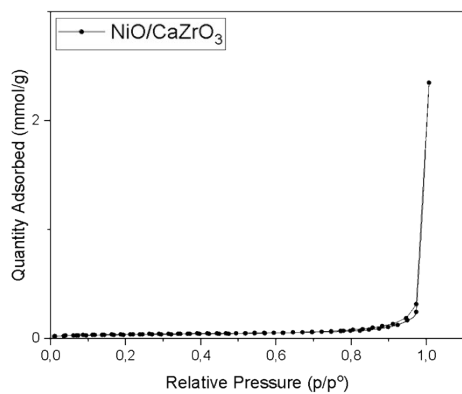

d)

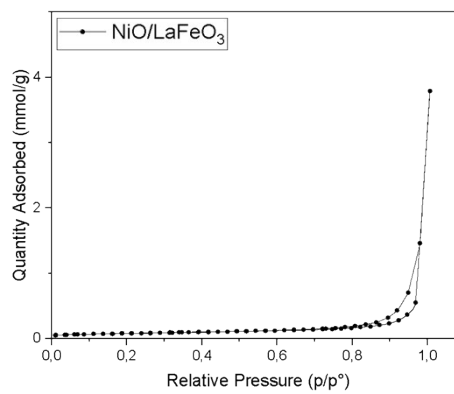

## 2. MEASUREMENTS OF THE REDUCED SAMPLES

FIG. A.3- XRD pattern of post-reduction experiment on NiO/Al<sub>2</sub>O<sub>3</sub> catalysts (a), NiO/MgAl<sub>2</sub>O<sub>4</sub>-Al<sub>2</sub>O<sub>3</sub> (b), NiO/CaZrO<sub>3</sub> (c), NiO/LaFeO<sub>3</sub> (d) (H<sub>2</sub>-TPR heating from room temperature to 900 °C) and of NiO/LaFeO<sub>3</sub> (d) (H<sub>2</sub>-TPR heating from room temperature to 600 °C) (in black), and their respective pre-reduction catalysts (in red).

b)

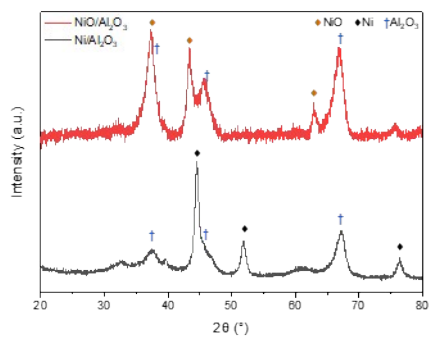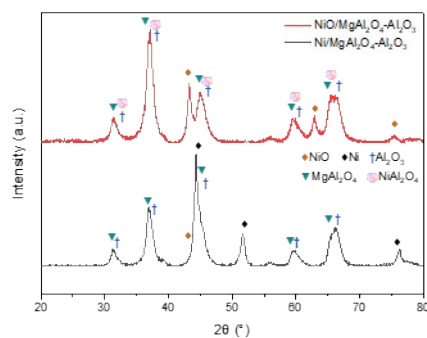

a)

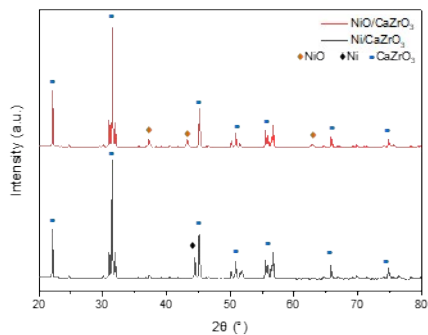

c)

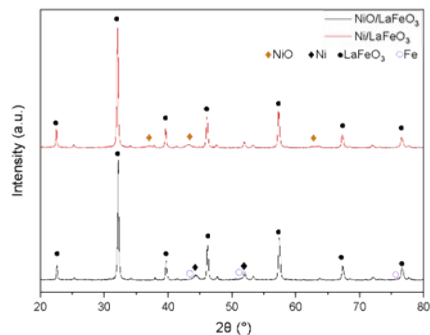

d)

e)

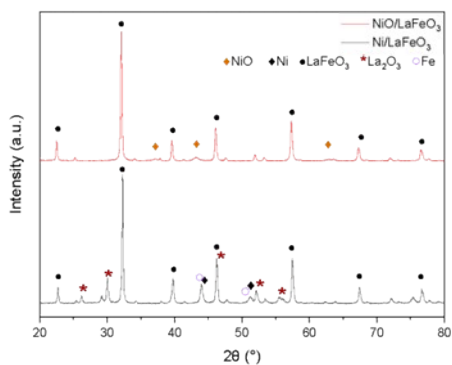

| Sample                                                              | Metal Dispersion (%) |
|---------------------------------------------------------------------|----------------------|
| Ni/Al <sub>2</sub> O <sub>3</sub>                                   | 0.31%                |
| Ni/MgAl <sub>2</sub> O <sub>4</sub> -Al <sub>2</sub> O <sub>3</sub> | 0.36%                |
| Ni/CaZrO <sub>3</sub>                                               | 1.66%                |
| Ni/LaFeO <sub>3</sub>                                               | 0.26%                |

TABLE A.1- Nickel Dispersion for all samples

TABLE A.2 -H<sub>2</sub> quantity (cm<sup>3</sup>/g) employed in TPR measurements and evaluation of the experimental quantity of NiO reduced, as well as the theoretical quantity of NiO present in each sample and the calculated percentage of NiO reduced in each sample.

| Sample | Quantity H <sub>2</sub> (cm <sup>3</sup> /g) | m <sub>NiO</sub> / g | m <sub>NiO teorico</sub> /g | %NiO ridotto |
|--------|----------------------------------------------|----------------------|-----------------------------|--------------|
|--------|----------------------------------------------|----------------------|-----------------------------|--------------|

|                                                                      |       |      |      |        |
|----------------------------------------------------------------------|-------|------|------|--------|
| NiO/Al <sub>2</sub> O <sub>3</sub>                                   | 39.08 | 0.13 | 0.16 | 79.83  |
| NiO/MgAl <sub>2</sub> O <sub>4</sub> -Al <sub>2</sub> O <sub>3</sub> | 45.41 | 0.15 | 0.17 | 91.39  |
| NiO/CaZrO <sub>3</sub>                                               | 54.76 | 0.18 | 0.17 | 110.34 |
| NiO/LaFeO <sub>3</sub>                                               | 55.72 | 0.19 | 0.17 | 109.33 |

The table shows that perovskites samples allowed the complete reduction of NiO, with an error due to the semiquantitative nature of the evaluation. For alumina-based samples, NiO reduced was evaluated as 20-30% less than perovskite-based samples. This might be due to the presence of the spinel NiAl<sub>2</sub>O<sub>4</sub>, which needs high temperatures to be reduced.

FIG. A.4- SEM-EDX maps of Ni/Al<sub>2</sub>O<sub>3</sub> (a), Ni/MgAl<sub>2</sub>O<sub>4</sub>-Al<sub>2</sub>O<sub>3</sub> (b), Ni/CaZrO<sub>3</sub> (c) and Ni/LaFeO<sub>3</sub> (d) catalysts after H<sub>2</sub>-TPR.

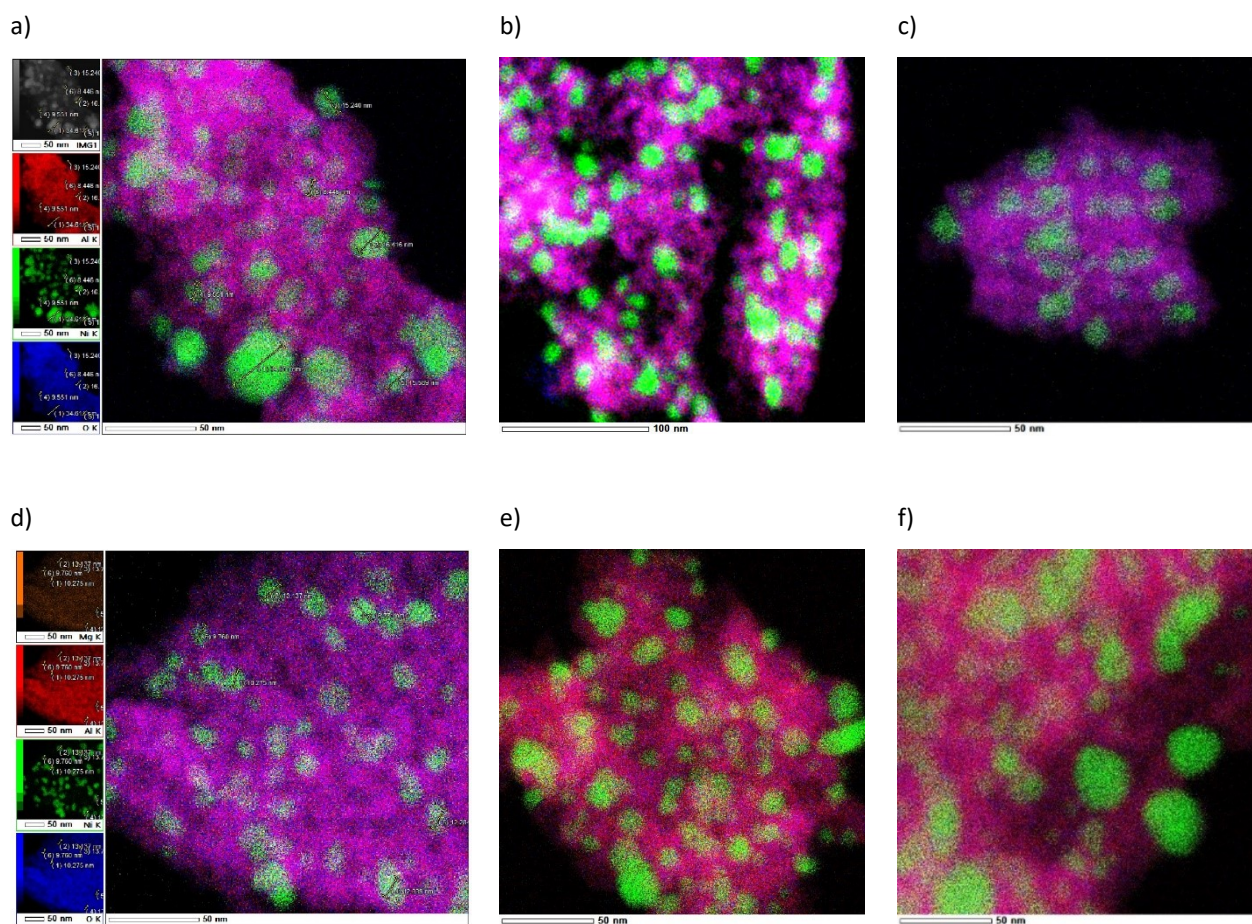

g)

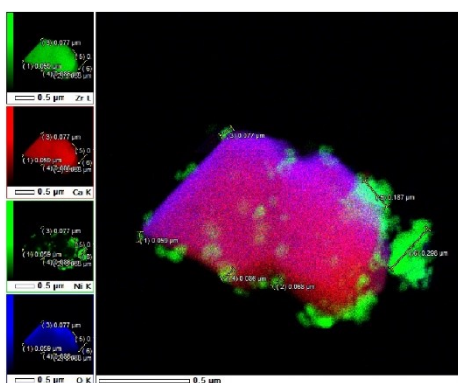

h)

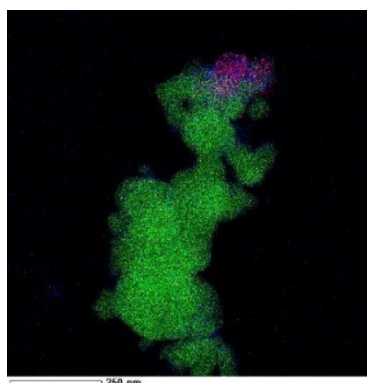

i)

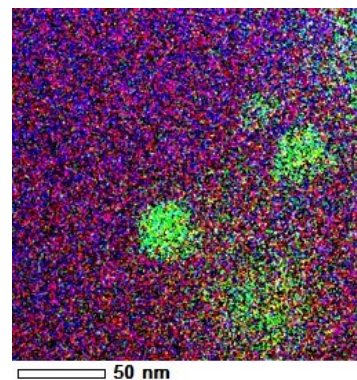

j)

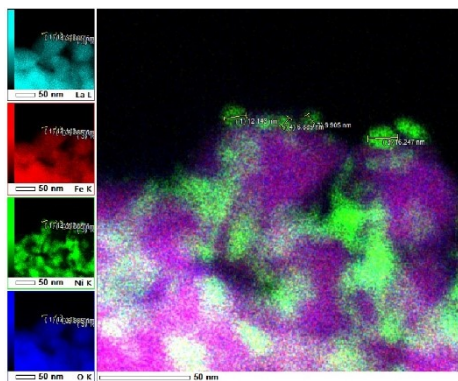

k)

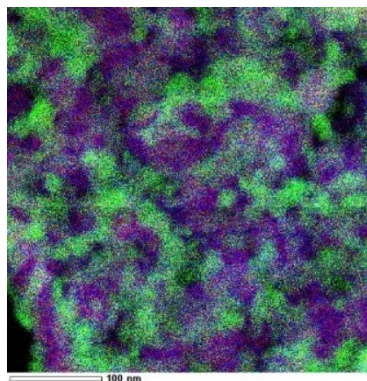

l)

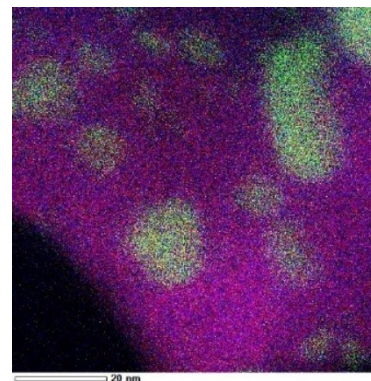

FIG. A.5- Ni 2p photopeaks with the fitting obtained from the different contributions of Ni species following spin-orbital splitting rules for  $\text{Ni}/\text{Al}_2\text{O}_3$  (a) and  $\text{Ni}/\text{MgAl}_2\text{O}_4\text{-Al}_2\text{O}_3$  (b) samples (after  $\text{H}_2$ -TPR).

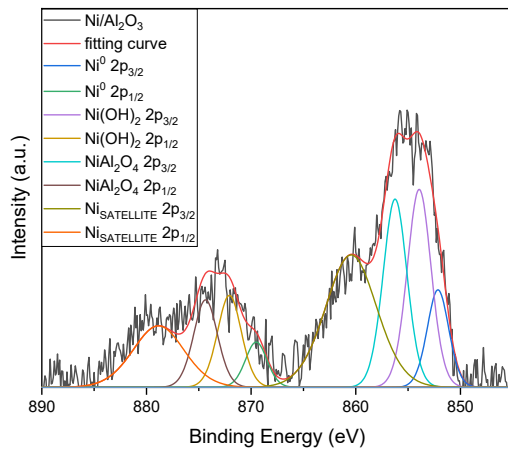

a)

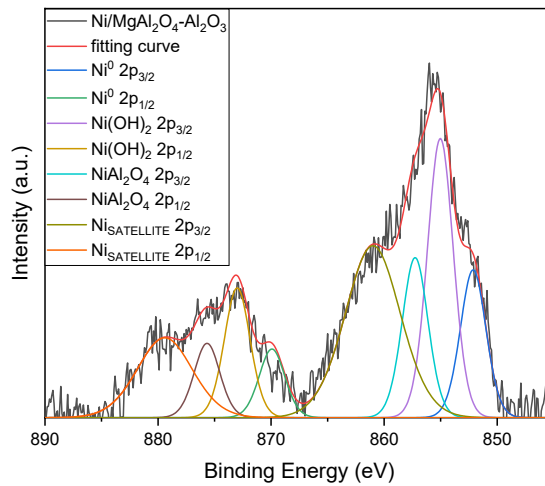

b)

### 3. XPS STUDY

TABLE A.3- Binding energy position (BE) and Area of XPS peak fitting contributions.

|                             | Fe <sup>0</sup><br>Fe2p3/2 | Fe <sup>0</sup><br>Fe2p1/2 | LaFeO <sub>3</sub><br>Fe2p3/2 | LaFeO <sub>3</sub><br>Fe2p1/2 |
|-----------------------------|----------------------------|----------------------------|-------------------------------|-------------------------------|
| <b>Ni/LaFeO<sub>3</sub></b> |                            |                            |                               |                               |
| BE (eV)                     | 706.72                     | 718.20                     | 710.26                        | 723.20                        |
| A (CPS.eV)                  | 2664.03                    | 1089.47                    | 17591.36                      | 7718.61                       |

|                                                                     | Ni <sup>0</sup><br>Ni2p3/2                | Ni <sup>0</sup><br>Ni2p1/2                | Ni(OH) <sub>2</sub><br>Ni2p3/2              | Ni(OH) <sub>2</sub><br>Ni2p1/2              | NiAl <sub>2</sub> O <sub>4</sub><br>Ni2p3/2 | NiAl <sub>2</sub> O <sub>4</sub><br>Ni2p1/2 | Ni sat.<br>Ni2p3/2      | Ni sat.<br>Ni2p1/2                       |
|---------------------------------------------------------------------|-------------------------------------------|-------------------------------------------|---------------------------------------------|---------------------------------------------|---------------------------------------------|---------------------------------------------|-------------------------|------------------------------------------|
| <b>Ni/Al<sub>2</sub>O<sub>3</sub></b>                               |                                           |                                           |                                             |                                             |                                             |                                             |                         |                                          |
| BE (eV)                                                             | 851.84                                    | 869.22                                    | 853.64                                      | 871.77                                      | 855.94                                      | 874.05                                      | 860.14                  | 878.55                                   |
| A (CPS.eV)                                                          | 3391.14                                   | 1575.97                                   | 7628.25                                     | 3545.08                                     | 7254.35                                     | 3371.31                                     | 10930.02                | 5079.42                                  |
| <b>Ni/MgAl<sub>2</sub>O<sub>4</sub>-Al<sub>2</sub>O<sub>3</sub></b> |                                           |                                           |                                             |                                             |                                             |                                             |                         |                                          |
| BE (eV)                                                             | 852.13                                    | 869.93                                    | 855.03                                      | 873.00                                      | 857.26                                      | 875.67                                      | 861.00                  | 879.41                                   |
| A (CPS.eV)                                                          | 7846.74                                   | 3646.662                                  | 14936.24                                    | 69.4132                                     | 8559.51                                     | 3977.86                                     | 19694.20                | 9152.00                                  |
|                                                                     | Al <sub>2</sub> O <sub>3</sub><br>Al2p3/2 | Al <sub>2</sub> O <sub>3</sub><br>Al2p1/2 | NiAl <sub>2</sub> O <sub>4</sub><br>Al2p3/2 | NiAl <sub>2</sub> O <sub>4</sub><br>Al2p1/2 | MgAl <sub>2</sub> O <sub>4</sub><br>Al2p3/2 | MgAl <sub>2</sub> O <sub>4</sub><br>Al2p1/2 | Mg <sup>0</sup><br>Mg1s | MgAl <sub>2</sub> O <sub>4</sub><br>Mg1s |
| <b>Ni/Al<sub>2</sub>O<sub>3</sub></b>                               |                                           |                                           |                                             |                                             |                                             |                                             |                         |                                          |
| BE (eV)                                                             | 73.57                                     | 74.18                                     | 74.67                                       | 75.44                                       |                                             |                                             |                         |                                          |
| A (CPS.eV)                                                          | 11808.111                                 | 5919.89                                   | 2358.50                                     | 1182.41                                     |                                             |                                             |                         |                                          |
| <b>Ni/MgAl<sub>2</sub>O<sub>4</sub>-Al<sub>2</sub>O<sub>3</sub></b> |                                           |                                           |                                             |                                             |                                             |                                             |                         |                                          |
| BE (eV)                                                             | 73.18                                     | 73.68                                     | 74.13                                       | 74.64                                       | 75.20                                       | 75.74                                       | 1302.93                 | 1305.32                                  |
| A (CPS.eV)                                                          |                                           |                                           | 96.1121                                     | 4818.49                                     | 2046.38                                     | 1025.93                                     | 20144.23                | 8580.86                                  |
|                                                                     | C=C bond<br>C1s                           | C-C bond<br>C1s                           | C-O-C<br>bond C1s                           | O=C-O<br>bond C1s                           |                                             |                                             |                         |                                          |
| <b>Ni/Al<sub>2</sub>O<sub>3</sub></b>                               |                                           |                                           |                                             |                                             |                                             |                                             |                         |                                          |
| BE (eV)                                                             | 284.45                                    | 284.73                                    | 285.23                                      | 289.37                                      |                                             |                                             |                         |                                          |
| A (CPS.eV)                                                          | 62122.64                                  | 25467.96                                  | 52836.89                                    | 13424.96                                    |                                             |                                             |                         |                                          |
| <b>Ni/MgAl<sub>2</sub>O<sub>4</sub>-Al<sub>2</sub>O<sub>3</sub></b> |                                           |                                           |                                             |                                             |                                             |                                             |                         |                                          |
| BE (eV)                                                             | 284.46                                    | 284.75                                    | 285.06                                      | 288.89                                      |                                             |                                             |                         |                                          |
| A (CPS.eV)                                                          | 64453.52                                  | 5215777.87                                | 55251.15                                    | 13375.45                                    |                                             |                                             |                         |                                          |
| <b>Ni/CaZrO<sub>3</sub></b>                                         |                                           |                                           |                                             |                                             |                                             |                                             |                         |                                          |
| BE (eV)                                                             |                                           | 284.71                                    | 287.16                                      | 290.13                                      |                                             |                                             |                         |                                          |
| A (CPS.eV)                                                          |                                           | 12466.65                                  | 3398.47                                     | 547.53                                      |                                             |                                             |                         |                                          |
| <b>Ni/LaFeO<sub>3</sub></b>                                         |                                           |                                           |                                             |                                             |                                             |                                             |                         |                                          |
| BE (eV)                                                             | 284.51                                    | 284.81                                    | 286.31                                      | 288.48                                      |                                             |                                             |                         |                                          |
| A (CPS.eV)                                                          | 57215.80                                  | 17367.25                                  | 20425.33                                    | 6113.34                                     |                                             |                                             |                         |                                          |

#### 4. CATALYTIC TESTS

TABLE A.4- TOF<sub>CH<sub>4</sub></sub> and TOF<sub>CO<sub>2</sub></sub> of Ni/Al<sub>2</sub>O<sub>3</sub>, Ni/MgAl<sub>2</sub>O<sub>4</sub>-Al<sub>2</sub>O<sub>3</sub>, Ni/CaZrO<sub>3</sub>, Ni/LaFeO<sub>3</sub> for 5 % CH<sub>4</sub>, 5 % CO<sub>2</sub>, 1 % NO in Ar <sup>(a)</sup> and 25 % CH<sub>4</sub>, 25 % CO<sub>2</sub>, 1 % NO in Ar <sup>(b)</sup> gas mixtures, calculated at t=200 min (time at which conversions were stable over time).

|                                                                     | Dispersion (%) | SSA (m <sup>2</sup> /g) | TOF <sub>CH<sub>4</sub></sub> <sup>a</sup> (s <sup>-1</sup> ) | TOF <sub>CH<sub>4</sub></sub> <sup>b</sup> (s <sup>-1</sup> ) |
|---------------------------------------------------------------------|----------------|-------------------------|---------------------------------------------------------------|---------------------------------------------------------------|
| <b>Ni/Al<sub>2</sub>O<sub>3</sub></b>                               | 0.31           | 105                     | 12                                                            | 102                                                           |
| <b>Ni/MgAl<sub>2</sub>O<sub>4</sub>-Al<sub>2</sub>O<sub>3</sub></b> | 0.36           | 62                      | 6.5                                                           | 81                                                            |
| <b>Ni/CaZrO<sub>3</sub></b>                                         | 1.66           | 3                       | 0                                                             | 0                                                             |
| <b>Ni/LaFeO<sub>3</sub></b>                                         | 0.26           | 6                       | 23                                                            | 62                                                            |

  

|                                                                     | TOF <sub>CO<sub>2</sub></sub> <sup>a</sup> (s <sup>-1</sup> ) | TOF <sub>CO<sub>2</sub></sub> <sup>b</sup> (s <sup>-1</sup> ) | NO conversion rate <sup>a</sup> (%) | NO conversion rate <sup>b</sup> (%) |
|---------------------------------------------------------------------|---------------------------------------------------------------|---------------------------------------------------------------|-------------------------------------|-------------------------------------|
| <b>Ni/Al<sub>2</sub>O<sub>3</sub></b>                               | 14                                                            | 102                                                           | 100                                 | 100                                 |
| <b>Ni/MgAl<sub>2</sub>O<sub>4</sub>-Al<sub>2</sub>O<sub>3</sub></b> | 8.4                                                           | 90                                                            | 100                                 | 100                                 |
| <b>Ni/CaZrO<sub>3</sub></b>                                         | 1.4                                                           | 0                                                             | 100                                 | 100                                 |
| <b>Ni/LaFeO<sub>3</sub></b>                                         | 23                                                            | 115                                                           | 100                                 | 100                                 |

\*complete NO conversion to N<sub>2</sub>

FIG. A.6- Extended XPS spectra of post-reaction NiO/Al<sub>2</sub>O<sub>3</sub>, NiO/MgAl<sub>2</sub>O<sub>4</sub>-Al<sub>2</sub>O<sub>3</sub>, NiO/CaZrO<sub>3</sub> and NiO/LaFeO<sub>3</sub> catalysts.

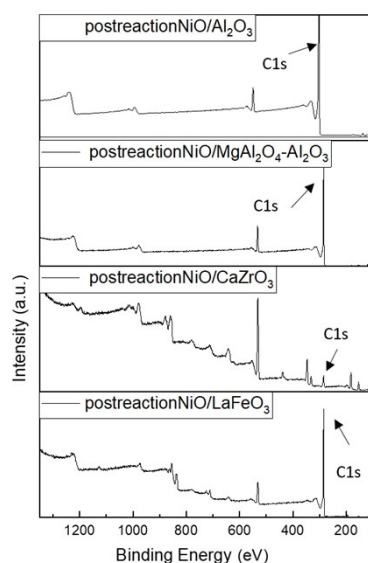



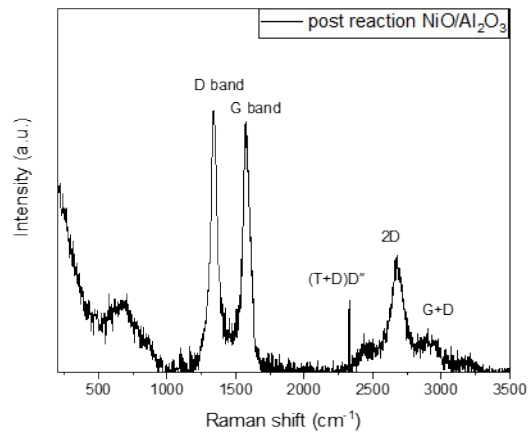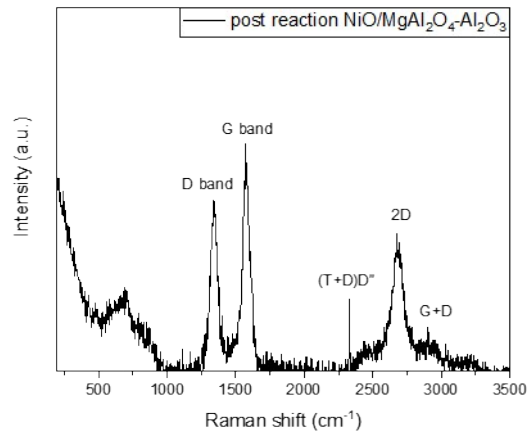

FIG. A.7.- Raman spectra for NiO/Al<sub>2</sub>O<sub>3</sub>, NiO/MgAl<sub>2</sub>O<sub>4</sub>-Al<sub>2</sub>O<sub>3</sub> and NiO/LaFeO<sub>3</sub> catalysts. Spectra were acquired with focus 50X in a range between 200 and 3500 cm<sup>-1</sup> except in NiO/LaFeO<sub>3</sub> spectra, where the acquisition range was reduced to 1000-2500 cm<sup>-1</sup> to obtain a comparable resolution with the other spectra and minimize LaFeO<sub>3</sub> fluorescence issues.

- a)
- b)
- c)

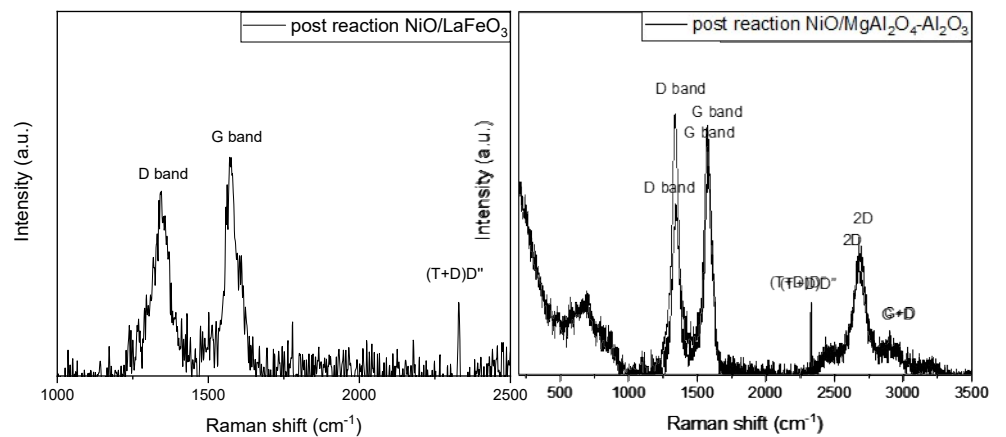

Supplement: d4cy00936c1.pdf [file d4cy00936c1.pdf]
